# Supplementary material for: Construction of an artificial phosphoketolase pathway that efficiently catabolizes multiple carbon sources to acetyl-CoA
Source: PLoS Biol. 2023 Sep 21;21(9):e3002285. doi: 10.1371/journal.pbio.3002285 (PMC10547157; doi:10.1371/journal.pbio.3002285)
Supplement: S1 Data — (XLSX) [file pbio.3002285.s034.xlsx]

## Sheet: Sheet1
Fig 2B. Raw data of catalytic activity of PKs from different species on different substrates
		U/mg
		GALD	Chloroflexi Nitrolancea	Alphaproteobacteria Agrobacterium	Alphaproteobacteria Sphingomomas	Fungi	Gamaproteobacteria Marinicella	Firmicutes Lactobacillas	Actinobacteria bifidobacterium
		Parallel 1	0.00648667	0.00784667	0.0153267	0.0316467	0.0105667	0.0370867	0.0962467
		Parallel 2	0.00920667	0.00988667	0.0105667	0.0228067	0.0139667	0.0479667	0.127527
		Parallel 3	0.0119267	0.00716667	0.0105667	0.0296067	0.0132867	0.0438867	0.113927
		DHA	Chloroflexi	α-proteobacteria-2	α-proteobacteria		γ-proteobacteria	Firmicutes	Actinobacteria
		Parallel 1	0.0241667	0.0194067	0.00988667	0.0438867	0.0826467	0.0588467	0.158807
		Parallel 2	0.0139667	0.0207667	0.00920667	0.0432067	0.0758467	0.0568067	0.150647
		Parallel 3	0.0139667	0.0173667	0.00988667	0.0418467	0.119367	0.0656467	0.160847
		L-EUS	Chloroflexi	α-proteobacteria-2	α-proteobacteria		γ-proteobacteria	Firmicutes	Actinobacteria
		Parallel 1	0.00852667	-0.000313333	-0.000313333	0.00920667	0.0316467	0.0221267	0.179207
		Parallel 2	0.00988667	-0.000313333	-0.000313333	0.0153267	0.0323267	0.0153267	0.203007
		Parallel 3	0.00920667	-0.000313333	-0.000313333	0.0126067	0.0316467	0.0200867	0.184647
		D-EUS	Chloroflexi	α-proteobacteria-2	α-proteobacteria		γ-proteobacteria	Firmicutes	Actinobacteria
		Parallel 1	0.0785667	0.0398067	0.102367	0.126167	0.256047	0.212527	0.537567
		Parallel 2	0.0860467	0.0289267	0.103727	0.142487	0.204367	0.207087	0.506287
		Parallel 3	0.0683667	0.0404867	0.126847	0.120047	0.196887	0.188727	0.469567
		F6P	Chloroflexi	α-proteobacteria-2	α-proteobacteria		γ-proteobacteria	Firmicutes	Actinobacteria
		Parallel 1	-0.0952381	-0.228571	13.4857	0.228571	13.1048	0.152381	13.5619
		Parallel 2	-0.0952381	-0.209524	17.3524	0.609524	15.8095	0.72381	17.2
		Parallel 3	-0.171429	-0.247619	17.5429	0.647619	17.0286	0.609524	18.4
		Xu5P	Chloroflexi	α-proteobacteria-2	α-proteobacteria		γ-proteobacteria	Firmicutes	Actinobacteria
		Parallel 1	4.34286	5.6381	6.26667	13.3333	43.3524	15.0476	30.7238
		Parallel 2	4.64762	5.98095	6.3619	11.3524	37.7143	12.5333	21.981
		Parallel 3	4.49524	6.07619	5.18095	10.5333	47.8286	13.1429	25.0095
Fig 3B. Raw data of relative activity of wild-type BbPK and beneficial mutants on GALD, DHA and D-EUS
		GALD(relative activity)						DHA(relative activity)						D-EUS(relative activity)
			data-1	data-2	data-3				data-1	data-2	data-3				data-1	data-2	data-3
		WT	0.00067371	0.000847819				WT	0.00170071	0.00116146	0.00123059			WT	0.868799	1.15843	0.972775
		H142N	6.91827	5.27364	4.98827			Q321A	5.27028	4.79156	5.57976			H142N	3.62008	2.15269	2.85515
		R524K	2.35821	2.46766	1.96329			E520I	4.03379	3.9527	3.64395
		P136A-H142N	1.23376	1.3631	1.66543			Q321A-E520Q	1.90305	2.07318	2.16892
		H142N-R524K	1.33333	2.26746	1.31343			Q321A-E520L	0.770272	1.17332	0.892147
		P136V-H142N	2.11941	2.04975	1.93204			Q321A-E520I	1.52805	1.77836	1.71827
Fig 4C. Raw data of screening process for specific phosphatases targeting E4P and DHAP
		Enzyme acativity ratio
				E4P	F6P	DHAP	Xu5P	G3P
		PfHAD	Parallel 1	0.41	0.41	0.14	0.74	0.14
			Parallel 2	0.53	0.5	0.25	0.67	0.17
			Parallel 3	0.64	0.54	0.21	0.49	0.2
		EcHAD	Parallel 1	0.66	0.33	0.24	0.3	0.48
			Parallel 2	0.6	0.35	0.22	0.29	0.51
			Parallel 3	0.76	0.3	0.19	0.26	0.52
		NbIMP	Parallel 1	0.66	0.45	0.25	0.26	0.44
			Parallel 2	0.63	0.36	0.15	0.33	0.15
			Parallel 3	0.51	0.4	0.42	0.62	0.39
		TmHAD	Parallel 1	0.34	0.61	0.15	0.8	0.12
			Parallel 2	0.45	0.72	0.24	0.58	0.15
			Parallel 3	0.36	0.52	0.1	0.76	0.09
		CpHAD	Parallel 1	0.36	0.7	0.42	0.18	0.29
			Parallel 2	0.43	0.57	0.49	0.25	0.31
			Parallel 3	0.29	0.65	0.69	0.2	0.18
		XiHAD	Parallel 1	0.31	0.71	0.33	0.29	0.26
			Parallel 2	0.3	0.72	0.4	0.31	0.42
			Parallel 3	0.23	0.72	0.29	0.3	0.4
Fig 4D. Raw data of metabolite analysis of the APK pathway for F6P											Fig 4E. Raw data of metabolite analysis of the APK pathway for Xu5P
		Carbon abundance for F6P									Carbon abundance for Xu5P
		time（h）	0	2	4	6	8	10			time（h）	0	2	4	6	8	10
		C6	1	0	0	0	0	0			C5	1	0	0	0	0	0
			1	0	0	0	0	0				1	0	0	0	0	0
			1	0	0	0	0	0				1	0	0	0	0	0
		C4	0	0.0574516	0.061153	0.0321375	0.0085875	0.00415988			C3	0	0.69747	0.373905	0.219063	0.0527663	0.045282
			0	0.0938228	0.0570828	0.0449587	0.00708242	0.00575451				0	0.652281	0.459972	0.283095	0.0619861	0.0602497
			0	0.109961	0.0674515	0.0465983	0.0084832	0.00645047				0	0.815288	0.422127	0.299927	0.0650325	0.057172
		C2	0	0.0478918	0.113739	0.173787	0.14526	0.107142			C1	0	0.047981	0.138724	0.0696772	0.0574046	0.0306106
			0	0.0413158	0.136756	0.156241	0.141957	0.120719				0	0.0535485	0.166076	0.137282	0.0722361	0.0505091
			0	0.0350278	0.132716	0.145441	0.180588	0.126653				0	0.0646102	0.210271	0.131022	0.0703611	0.0472403
		Ac	0	0.32172	0.537492	0.719927	0.708959	0.812324			Ac	0	0.212041	0.390031	0.696779	0.809547	0.947269
			0	0.415914	0.488662	0.605157	0.738985	0.900788				0	0.207729	0.491703	0.566144	0.961629	0.859795
			0	0.313013	0.517811	0.616398	0.892056	0.78957				0	0.24826	0.346691	0.595752	0.849918	0.902393
Fig 4F. Raw data of APK pathway for the utilization of C1, C2, C3, and C4 carbon sources
			EUS	DHA	GALD	FALD
		Parallel 1	0.928	0.834667	0.916	0.856
		Parallel 2	0.897	0.898667	0.958	0.859
		Parallel 3	0.965	0.909333	0.974	0.776
Fig S13. Raw data of high-throughput screening of BbPK for glycolaldehyde
		1	2	3	4	5	6	7	8	9	10	11	12	13	14	15	16	17	18	19	20	21	22
	V62	1.05063	0.261603	0.350211	0.257384	0.521097	0.265823	0.259494	0.270042	0.316456	0.599156	0.28481	1.15612	0.263713	0.234177	0.232068	0.308017	0.259494	0.738397	0.913502	0.246835	0.223629	0.64557
	G63	0.903797	0.553797	0.629114	0.513924	0.598101	0.553797	0.996835	0.505063	0.629114	1.08101	0.553797	1.08544	0.531646	0.7	0.46519	0.598101	0.46519	0.46519	0.544937	0.606962	0.602532	0.429747
	W65	0.970042	0.505907	0.589451	1.28101	0.580169	0.649789	0.543038	0.575527	0.51519	1.51561	0.51519	1.13249	0.510549	0.566245	1.28101	0.505907	0.496624	0.487342	0.496624	0.538397	0.58481	1.00253
	G96	1.45992	0.915612	0.476793	1.05907	1.05063	0.451477	0.540084	0.658228	0.582278	0.552743	0.670886	1.25738	0.620253	0.578059	0.468354	1.16878	0.476793	0.447257	0.586498	0.552743	0.7173	0.443038
	G98	0.818565	0.472574	0.459916	0.455696	0.451477	0.434599	0.455696	0.451477	0.455696	0.468354	0.485232	1.48945	0.481013	0.459916	0.447257	0.438819	0.42616	0.421941	0.443038	0.451477	0.50211	0.459916
	G99	1.05696	0.265823	0.219409	0.28692	0.229958	0.244726	0.236287	0.261603	0.234177	0.337553	0.257384	1.22152	1.28903	0.227848	0.257384	0.227848	0.229958	0.223629	0.232068	0.236287	0.221519	0.248945
	Y135	1.37131	0.240506	0.225738	1.49156	0.238397	0.229958	0.225738	0.219409	1.0211	0.28692	0.238397	1.36287	0.240506	0.225738	0.242616	0.221519	0.327004	0.246835	0.303797	0.21519	0.208861	0.21519
	P136	0.485232	0.364979	0.236287	0.240506	0.225738	1.04807	1.12661	1.05837	1.14936	1.01545	0.999571	0.990987	0.976395	0.977682	0.990558	0.992275	0.225738	0.251055	0.280591	0.223629	0.341772	0.445148
	S141	1.20675	0.64557	0.518987	0.902954	0.734177	1.02532	1.15408	1.07296	1.14678	1.00644	1.00429	0.996137	0.977253	0.984549	0.994421	0.999142	0.510549	0.421941	0.611814	0.518987	0.409283	0.421941
	H142	0.995409	1.00642	1.02713	1.07384	1.0571	1.02833	1.12661	1.0691	1.17296	1.02661	1.00043	1.00086	0.952361	0.980258	0.995708	1.00472	1.14214	1.069	1.04476	1.06018	1.06547	1.05974
	G154	1.29958	0.753165	0.575949	0.314346	0.261603	1.04791	1.05901	1.05723	1.20852	0.988465	1.00044	1.03682	0.992014	0.97205	1.0173	1.02839	0.21519	0.765823	0.244726	0.28903	0.261603	0.246835
	I219	1.16034	1.13713	0.198312	0.21519	1.51477	1.06699	1.05679	1.01331	1.19831	0.984472	1.02972	1.02662	1.01242	0.988909	1.07098	1.05368	0.400844	0.360759	0.390295	0.434599	0.493671	0.335443
	Q321	0.966245	1.14768	0.409283	0.405063	1.22574	1.04525	1.04525	1.02795	2.26442	0.985803	1.04348	1.00355	1.00577	1.00355	1.05501	1.03461	0.257384	0.261603	2.41561	0.622363	0.373418	0.85865
	V322	1.07595	1	0.42827	0.251055	0.341772	1.063	1.03327	1.03327	1.22183	0.987578	1.06034	1.04126	1.0071	0.987578	1.02041	1.04525	0.261603	0.341772	0.348101	0.253165	0.227848	0.244726
	S440	1.51055	1.43671	0.99789	0.837553	0.827004	1.0701	1.04259	1.02484	1.28172	0.984916	1.04747	1.04259	1.01952	0.984916	1.06389	1.03061	1.15612	0.957806	1.36709	1.27426	1.23629	1.05696
	N441	1.58228	1.4557	0.204641	0.255274	1.07806	1.08119	1.08341	0.996894	1.24933	0.996894	1.01863	1.0417	1.00754	1.0213	1.06078	1.05634	0.732068	0.238397	0.219409	0.335443	0.413502	0.208861
	E520	1.34177	1.31224	0.232068	0.71097	0.660338	1.00311	1.0803	1.01154	2.22094	0.987134	1.0386	1.02263	0.998669	0.992458	1.05768	4.04969	0.590717	1.01899	0.934599	2.80169	0.736287	0.613924
	R524	0.777515	0.780558	0.805779	0.854916	0.844045	0.851437	0.954493	0.867091	0.952319	0.836218	0.819259	0.832304	0.780993	0.816215	0.793604	0.815345	1.12669	0.847089	0.827956	0.87057	0.852741	0.841436
	S541	0.878224	0.907306	0.902459	0.957098	0.968555	0.950048	1.11837	0.976927	1.07431	0.950489	0.922288	0.919203	0.865445	0.954014	0.913475	0.942557	1.25365	0.925813	0.938151	0.957539	0.959742	0.941235
	R545	0.966524	0.974678	0.984549	1.05923	1.0309	0.219409	0.244726	0.21519	0.223629	0.227848	0.234177	0.310127	1.18987	0.21097	0.208861	0.208861	1.32017	0.983691	1.04506	1.0309	1.0382	1.003
	Q546	0.955365	0.945494	0.984549	1.01288	1.01373	0.945148	1.0211	0.561181	0.514768	0.417722	1.32068	1.24051	1	0.43038	0.510549	0.481013	1.36481	1.02704	1.01545	1.05064	1.04549	1.03433
	D547	0.944206	0.953648	0.983691	1.01288	1.00215	1.05137	1.10116	1.11306	1.10337	1.07296	1.00863	0.998052	0.960157	1.0452	1.02361	1.05137	1.3588	1.00644	1.03519	1.00429	1.02833	1.03777
	H548	1.00488	1.01863	1.06211	1.01642	1.16238	0.257384	0.246835	0.852321	0.375527	0.21097	0.951477	1.32911	0.900844	0.2173	0.21519	0.223629	1.02218	1.01331	1.07631	1.06744	1.18545	0.972937
	N549	1.03771	1.0102	1.05812	1.03815	1.15972	0.280591	0.299578	0.223629	0.291139	0.379747	0.945148	1.28059	0.21097	0.240506	0.293249	0.291139	1.0071	1.06211	1.06034	1.03815	1.23248	1.02396
	G550	1.0142	1.0559	1.04836	1.04525	1.14951	0.392405	0.248945	0.35443	0.238397	0.35443	1.03376	1.19409	0.259494	0.360759	0.367089	0.521097	1.03682	1.02795	1.08518	1.05723	1.20408	1.02706
	S552	1.01996	1.04215	1.06566	1.03638	1.13132	0.327004	0.221519	0.35654	0.816456	0.232068	0.879747	1.00633	0.234177	0.227848	0.240506	0.489451	1.05413	1.0417	1.0559	1.06744	1.22094	1.01952
	E735	0.99512	1.0244	1.05679	1.03904	1.13931	0.727848	1.20464	0.632911	1.22785	1.32068	1.31013	1.72574	1.52532	1.31435	1.38819	1.47046	1.04791	1.03682	1.04481	1.06921	1.20186	1.00488
	E736	1.04437	1.00887	1.06522	1.04747	1.15883	0.799578	1.03165	0.248945	0.567511	0.801688	0.869198	1.07173	0.232068	0.204641	0.521097	0.202532	1.03461	1.03194	1.06832	1.06344	1.17968	1.01642
	Q737	0.997782	1.01819	1.06877	1.0071	1.13975	0.706751	0.890295	0.708861	1.20253	0.879747	1.12236	1.35654	1.08228	0.626582	0.605485	0.542194	1.02839	1.04215	1.04126	1.05901	1.21517	1.02041
	G738	1.33	1.06731	1.24357	0.47	1.22398	1.37086	1.14565	1.21419	1.0869	1.3072	1.0869	1.38922	1.07711	1.19461	0.702558	1.06731	1.04773	1.02815	1.04773	1.13586	1.23378	1.11505
	S739	0.5	0.93167	1.00589	1.34	1.21653	0.952483	1.13942	1.38867	1.22844	1.16612	1.41537	1.65271	1.30855	1.21953	0.98809	1.46577	1.00589	0.943581	1.23734	1.16612	1.51329	0.934679
	T740	1.0479	0.777	0.2289	0.2184	0.2226	0.2331	0.2247	0.2268	0.3948	0.231	0.7392	1.0269	0.2226	0.2079	0.2751	0.2247	0.2289	0.2121	0.2226	0.2184	0.231	0.2184
	T741	1.08869	0.628523	0.611688	0.606076	0.600464	0.578017	0.606076	0.600464	0.606076	0.622911	0.645359	0.98	0.639747	0.611688	0.594852	0.583629	0.566793	0.561181	0.589241	0.600464	0.667806	0.611688
	T742	0.945	0.744	0.795	0.2295	0.306	0.846	0.1905	0.6765	0.279	0.2715	0.9075	1.143	0.207	0.348	0.243	0.183	0.684	0.273	0.2235	0.1935	0.309	0.2145
Fig S14. Raw data of iterative saturation mutagenesis of BbPK for glycolaldehyde (GALD)
	H142-S440	0.433815	0.961621	0.759856	0.914417	0.783667	0.083129	1.02574	0.936348	0.725602	0.063495	0.632656	1.00569	0.160201	0.634954	0.793692	0.297008	0.612396	0.041147	0.01838	0.054096	0.501906	0.336066
	H142-R524	1.38014	0.103335	1.38218	0.086988	1.05904	1.35445	0.792819	1.71992	0.679267	0.098373	1.29899	1.1291	0.193534	1.14603	0.481938	0.075896	0.581479	0.436693	0.732978	0.927096	0.622054	0.132818
	H142-S739	0.177991	0.57495	0.379352	0.532053	0.647619	0.40016	1.01	0.778231	0.586154	0.919728	0.410724	0.412965	0.212245	0.437935	0.412965	0.595758	0.276591	0.668427	0.735974	0.505802	0.609844	0.596399
	H142-P136	0.127183	0.172682	0.124	0.694313	0.554262	0.576291	1.5508	0.13518	2.30246	1.4969	0.175164	1.05411	1.53107	1.13074	0.752497	0.180893	1.07283	1.4666	0.090355	1.25685	0.144892	0.056836
	S440-R524	0.125228	0.141494	0.151522	0.161141	0.187609	0.141844	0.152454	0.146566	0.135956	0.386237	0.119981	0.296222	0.187726	0.323681	0.684208	0.392767	0.898519	0.133682	0.803374	0.12208	0.338315	0.109779
	S440-S739	0.09519	0.080434	0.100398	0.114575	0.066257	0.099241	0.122966	1.13996	0.116022	1.05143	0.083617	0.083906	0.110814	0.046582	0.059892	1.1119	0.124991	0.050922	0.096347	0.047161	0.06481	0.061338
	S440-P136	0.890885	1.21717	0.073885	0.632748	0.909588	1.26735	1.2679	0.866997	0.889218	1.18587	0.80737	1.33679	1.08865	0.053886	1.25902	0.929401	0.619601	1.09717	0.022777	0.677746	0.449609	0.71293
	R524-S739	0.133792	0.074766	0.120758	0.054353	0.371618	0.084358	0.248155	0.078947	0.469503	0.574274	0.073045	0.50123	0.05091	0.06788	0.115839	0.08608	0.235366	0.181997	0.226758	0.079931	0.067388	0.113871
	R524-P136	0.075698	0.086635	0.432102	0.339034	0.057042	0.883504	0.387284	1.08186	0.518308	0.370771	0.093711	0.675066	0.928108	0.796869	0.182062	0.752908	0.326382	0.119016	0.564842	0.096714	0.113011	0.091996
	S739-P136	0.207746	1.1594	0.099796	0.081533	0.275581	0.090338	0.107297	0.858051	0.109906	1.3342	0.09947	0.418426	0.243946	0.115777	0.316021	0.237097	0.472238	0.098492	0.189156	0.688137	0.090338	0.512678
Fig S15. Raw data of high-throughput screening of BbPK for dihydroxyacetone (DHA)
		1	2	3	4	5	6	7	8	9	10	11	12	13	14	15	16	17	18	19	20	21	22
	V62	1.09709	-0.834951	-0.859223	-0.776699	-0.218447	0.456311	-0.446602	-0.0728155	-0.126214	-0.0873786	-0.349515	0.5	-0.320388	-0.203883	-0.092233	-0.208738	-0.092233	-0.184466	-0.237864	0.0339806	0.208738	0.330097
	G63	1.12136	-0.325243	-0.364078	-0.393204	-0.461165	-0.529126	-0.441748	-0.519417	0.199029	0.538835	-0.0776699	0.0728155	-0.271845	-0.276699	-0.228155	-0.184466	-0.174757	-0.247573	-0.223301	0.271845	-0.135922	-0.126214
	W65	1.04369	0.519417	0.106796	0.441748	0.572816	-0.383495	-0.315534	-0.0436893	0.0485437	0.475728	-0.291262	0.592233	0.436893	-0.165049	0.203883	-0.398058	-0.0679612	-0.436893	-0.436893	-0.485437	0.150485	0.582524
	G96	1.80583	0.640777	-0.315534	1.16505	0.15534	1.08738	-0.237864	0.106796	1.30097	0.490291	-0.57767	0.699029	0.0485437	-0.247573	-0.179612	-0.150485	0.480583	0.242718	-0.247573	1.17476	-0.0533981	0.490291
	G98	0.73301	-0.373786	-0.247573	-0.524272	-0.567961	-0.300971	-0.325243	-0.407767	-0.42233	-0.0291262	-0.349515	0.446602	0.0970874	-0.126214	-0.373786	-0.160194	-0.160194	-0.257282	0.0145631	-0.281553	-0.194175	-0.038835
	G99	1.07282	-0.160194	-0.504854	0.101942	0	0.354369	-0.0291262	-0.524272	0.723301	-0.533981	-0.315534	-0.0436893	-0.349515	-0.509709	-0.519417	-0.485437	-0.368932	-0.509709	-0.533981	-0.529126	-0.34466	0.524272
	Y135	0.917476	-0.330097	-0.101942	-0.529126	0.0631068	-0.160194	-0.398058	-0.135922	-0.38835	0.34466	0.592233	0.781553	-0.160194	-0.203883	-0.0436893	-0.252427	-0.218447	0.131068	0.237864	-0.15534	0.0679612	0.300971
	P136	0.830097	1.6699	1.32524	0.0145631	0.398058	-0.208738	0.116505	-0.0679612	0.228155	1.56311	0.0436893	0.820388	0.145631	0.898058	0.441748	0.427184	0.0339806	0.752427	0.470874	0.315534	1.12621	0.893204
	S141	0.650485	1.15049	1.53398	0.679612	0.0582524	0.650485	0.179612	-0.864078	0.854369	0.859223	0.194175	1.18932	0.441748	0.820388	0.538835	-0.242718	0.0582524	0.451456	-0.699029	1.65049	0.349515	1.2233
	H142	1.46602	1.51942	1.07767	1.05825	5.25243	1.05825	1.27184	1.02913	1.33981	1.66019	-0.242718	1.19417	3.96117	0.548544	0.402913	0.65534	0.436893	6.31068	0.601942	0.771845	1.04369	1.75728
	G154	1.14078	1.41748	0.92	0.906	0.9568	0.9532	0.964	0.9652	0.978	0.9764	1.0116	0.9488	0.9288	0.694175	-0.0776699	-0.121359	-0.0339806	0.15534	0.373786	1.34951	1.42233	1.56311
	I219	0.771845	-0.334951	0.9236	0.9236	0.9524	0.956	0.964	1.0032	0.9504	0.94	0.9652	0.9716	0.9252	-0.592233	-0.597087	-0.475728	-0.509709	-0.533981	-0.558252	-0.626214	-0.194175	-0.23301
	Q321	0.771845	0.398058	0.916	0.9052	0.9496	0.95	0.9616	1.0036	0.9516	0.9592	0.9916	0.9228	0.9272	-0.242718	0.140777	-0.0631068	-0.0533981	-0.0436893	-0.00970874	-0.121359	0.281553	0.121359
	V322	0.665049	1.01456	0.23301	-0.00970874	0.0436893	0.116505	0.092233	-0.0873786	0.257282	0.23301	0.218447	1.15049	0.223301	0.699029	-0.257282	-0.237864	-0.140777	-0.0194175	-0.252427	-0.276699	0.106796	-0.640777
	S440	0.9	0.9348	0.9684	0.9484	0.9348	1.016	0.9576	0.9768	1.012	3.9588	0.9576	0.9288	0.906	0.948	0.9412	0.9412	1.982	0.9716	2.60194	0.771845	1.04369	1.75728
	N441	0.728155	0.354369	0.368932	0.305825	0.723301	0.68932	1.31553	1.16505	-0.092233	1.80583	1.19903	0.9192	-0.699029	1.65049	0.349515	1.2233	1.01942	2.45631	1.16019	0.0242718	-0.0533981	0.354369
	E520	0.9012	0.9148	0.9556	0.9372	0.9664	0.988	0.9672	0.9604	0.9924	0.9636	0.93	0.9248	0.9316	0.9264	0.9344	0.9748	0.9652	0.9724	0.9948	0.9696	0.9576	0.956
	R524	0.9208	0.9416	0.9444	0.9348	0.9716	0.9656	1.0024	0.9876	0.984	0.9768	-0.514563	-0.558252	-0.665049	-0.606796	-0.650485	-0.645631	-0.558252	-0.407767	0.0436893	0.815534	-0.470874	0.9372
	S541	0.305825	-0.286408	-0.436893	-0.315534	-0.354369	-0.262136	-0.31068	-0.038835	0.199029	0.509709	0.101942	0.9136	0.9164	0.9264	0.9456	0.972	0.9828	0.9696	0.9976	0.9928	0.968	0.9644
	R545	0.9076	0.9416	0.9608	0.9432	0.954	0.9852	0.9468	0.9424	0.9996	0.9344	0.9348	0.908	0.9184	0.9236	0.9356	0.9552	0.9496	0.9568	0.9664	0.9772	0.984	0.9596
	Q546	0.585232	0.464979	0.336287	0.340506	0.325738	1.14807	1.22661	1.15837	1.24936	1.11545	1.09957	1.09099	1.07639	1.07768	1.09056	1.09227	0.325738	0.351055	0.380591	0.323629	0.441772	0.545148
	D547	0.834951	1.08252	0.092233	-0.00970874	0.907767	-0.0242718	-0.0485437	-0.373786	0.495146	-0.150485	0.140777	0.325243	-0.00970874	-0.184466	0.407767	-0.15534	-0.286408	-0.116505	-0.203883	-0.174757	0.475728	0.558252
	H548	0.723301	0.830097	0.665049	0.368932	0.271845	-0.0291262	0.160194	-0.0825243	0.368932	0.106796	0.140777	0.985437	0.660194	-0.11165	-0.150485	0.296117	0.15534	0.339806	0.135922	-0.135922	0.427184	0.703883
	N549	0.849515	0.480583	-0.247573	-0.121359	-0.0436893	-0.121359	0.18932	0.606796	0.247573	0.349515	0.0825243	0.0873786	-0.106796	-0.15534	-0.213592	-0.165049	-0.0825243	-0.0970874	0.11165	-0.0776699	0.951456	0.563107
	G550	0.859223	0.334951	0.490291	-0.359223	0.635922	0.0145631	0.18932	-0.276699	0.15534	1.14563	0.533981	0.65534	-0.242718	0.11165	-0.42233	-0.402913	-0.42233	-0.504854	-0.0825243	-0.587379	-0.0194175	0.281553
	S552	0.9148	0.9288	0.9368	0.93	0.9444	0.9904	0.9716	0.9488	1.0124	0.9672	0.9544	0.9372	0.9056	0.9144	0.9608	0.9544	0.99	0.9556	0.9748	0.99	0.9648	0.9764
	E735	1.07767	0.5	0.213592	-0.194175	0.262136	-0.436893	-0.470874	-0.475728	-0.150485	0.160194	0.315534	0.461165	0.694175	-0.0145631	-0.504854	-0.466019	-0.543689	-0.504854	-0.490291	-0.640777	-0.42233	0.0825243
	E736	1.12621	1.16505	1.14563	1.06311	0.718447	0.674757	0.898058	0.859223	0.650485	1.08738	-0.169903	1.34951	1.15049	0.800971	0.703883	0.728155	0.567961	0.456311	0.84466	0.606796	0.980583	1.03883
	Q737	0.747573	1.29126	0.135922	0.135922	0.504854	-0.0970874	0.101942	-0.121359	0.854369	0.514563	0.23301	0.461165	0.975728	-0.126214	-0.101942	0.0194175	-0.349515	-0.11165	0.0145631	-0.165049	0.165049	0.582524
	G738	1.76699	1.57282	0.694175	1.08738	1.95631	1.82039	1.81553	0.587379	0.223301	0.456311	0.912621	1.06311	1.57767	1.17961	0.757282	1.03398	-0.0194175	0.0145631	0.169903	0	1.91748	1.6165
	S739	1.04854	1.99029	1.54854	1.47573	0.927184	0.417476	0.271845	1.66505	0.135922	0.140777	-0.276699	1.8932	1.13592	0.907767	0.820388	0.932039	0.941748	-0.15534	-0.558252	-0.660194	1.90291	1.12621
	T740	0.825243	0.781553	0.0436893	0.0533981	0.742718	-0.18932	-0.101942	0.927184	1.19903	1.33495	0.23301	0.92233	0.11165	-0.0533981	-0.203883	0.354369	-0.0582524	0.0436893	0.417476	-0.184466	0.902913	0.781553
	P136	1.78155	0.975728	0.417476	0.461165	0.456311	0.330097	0.150485	0.451456	0.281553	0.864078	0.271845	1.09709	0.81068	0.402913	0.165049	0.543689	0.364078	1.52913	0.208738	0.199029	1.19417	1.1165
	S141	1.30675	0.74557	0.618987	1.00295	0.834177	1.12532	1.25408	1.17296	1.24678	1.10644	1.10429	1.09614	1.07725	1.08455	1.09442	1.09914	0.610549	0.521941	0.711814	0.618987	0.509283	0.521941
Fig S16. Raw data of iterative saturation mutagenesis of BbPK for dihydroxyacetone (DHA)
	E520-Q321A	0.30832	0.568984	0.052396	1.19853	0.541338	0.029753	1.23354	0.072407	0.557135	0.112691	0.295155	0.513691	0.101896	0.034229	0.657451	0.372828	1.24118	0.16693	2.05292	0.157978	0.04792	0.058189
	E520-G550	1.21003	0.124855	1.18147	0.115557	0.948365	1.13631	0.688029	1.24656	1.02806	0.717251	0.141458	0.126183	0.885937	0.873983	0.146107	0.832143	0.911174	1.02474	0.117549	1.07255	0.123526	0.884609
	E520-E735	0.935726	0.878162	0.927507	1.02089	0.701434	0.524234	0.690799	0.027044	0.783626	0.029224	0.027103	0.025188	0.095007	0.025542	0.031375	0.029784	0.03214	0.025542	0.029194	0.039947	0.033113	0.952813
	E520-P136	0.479956	0.535477	0.0362463	0.0345598	0.0392446	0.143058	0.0297413	0.102769	0.513177	0.136526	0.86587	0.060714	0.16351	0.315322	0.0600179	0.0247889	0.0429656	0.548942	0.690099	0.0707794	0.692749	0.0249495
	Q321-G550	0.14441	0.0654	0.087326	0.110009	0.097155	0.58331	0.111899	0.291466	0.359134	0.057461	0.075985	0.280125	0.477838	0.041584	0.060108	0.090729	0.058974	0.058974	0.120972	0.059352	0.06351	0.120215
	Q321-E735	0.0575508	0.899341	0.105805	0.375408	0.0818992	0.0247911	0.0314316	0.0305462	0.158707	0.266726	0.0332024	0.0336451	0.0382934	0.0672901	0.120635	0.750152	0.132809	0.617564	0.0340878	0.558021	0.713851	0.941841
	Q321-P136	0.967594	0.0403519	0.86084	0.792565	1.28036	0.0287741	0.589614	0.594041	0.027412	1.31288	1.19711	1.12699	0.398581	0.0788309	0.0560159	0.295914	0.12378	0.0805335	0.0318388	0.575993	0.43723	0.177412
	G550-E735	0.022577	0.092341	0.535765	0.035094	0.024639	0.028963	0.269366	0.594708	0.05072	0.022125	0.025628	0.024583	0.023933	0.061655	0.421893	0.014919	0.281771	0.226275	0.13594	0.222263	0.027635	0.647518
	G550-P136	0.613666	0.029975	0.354868	0.794349	0.132218	0.78969	0.454588	0.030569	0.307352	0.04431	0.108683	0.355164	0.666672	0.561728	0.578556	0.033448	0.717571	0.630464	0.123523	0.629336	0.755559	0.768826
	E735-P136	0.139028	0.142455	0.541051	0.150517	0.844016	1.03952	0.752827	0.182619	0.812783	0.853912	0.140042	0.146704	0.151483	0.522272	0.894269	0.15602	1.15157	0.877325	0.660335	0.68674	0.215687	1.10547
Fig S17. Raw data of enzyme kinetics of wild-type BbPK and mutants for different substrates
	NADH consumption rate µmol min-1
	PK_H142N-GALD					PK_Q321A-DHA					PK_E520I-DHA					PK_WT-DHA
		data-1	data-2	data-3			data-1	data-2	data-3			data-1	data-2	data-3			data-1	data-2	data-3
	1	0.00177349	0.00179375	0.00126925		1	0.002594	0.002293	0.002212		1	0.0005021	0.000531	0.0008761		1	0.000304032	0.0003188	0.000335887
	5	0.00299022	0.00294567	0.00222258		2.5	0.00315	0.003687	0.003554		2.5	0.001089	0.000974	0.0011574		2.5	0.000437248	0.00046686	0.000424597
	10	0.00502137	0.00299002	0.00355312		5	0.004298	0.005761	0.005		5	0.00123841	0.0014438	0.00117566		5	0.00055814	0.000596295	0.000491457
	20	0.00697198	0.00535625	0.00502258		10	0.00632	0.005191	0.004804		10	0.001962	0.00187	0.001823		10	0.000776915	0.00083309	0.000806285
	30	0.00718004	0.00841452	0.00670302		20	0.007447	0.006299	0.005186		20	0.00304032	0.003188	0.00335887		20	0.0020323	0.0016647	0.0023851
	40	0.00870061	0.00846109	0.00714234		30	0.008353	0.006865	0.00594		30	0.00437248	0.0046686	0.00424597		30	0.00239584	0.0029598	0.0018915
	50	0.00870434		0.00794173		40	0.007836	0.006328	0.005911		40	0.0055814	0.00596295	0.00491457		40	0.00289379	0.00290268	0.003387
	60	0.00881361	0.0098248	0.00702621		50	0.008617	0.006282	0.005453		50	0.00576915	0.0063309	0.00576285		50	0.0029023	0.0020687	0.00380078
	70	0.0081874	0.00880443	0.00938165		60	0.00887	0.006735	0.005255		60	0.00621043	0.00738559	0.00639667		60	0.0035067	0.003024	0.00406891
	80	0.00802087	0.00717893	0.00688508		70	0.009891	0.007182	0.005975		70	0.0054942	0.00710257	0.00739163		70	0.0037167	0.00361235	0.0041941
	90	0.00888307	0.00871544	0.00859143		80	0.008104	0.006649	0.005579		80	0.00569103	0.00742893	0.00652495		80	0.00360694	0.00399788	0.00375671
	100	0.00836008	0.00790313	0.00748085		90	0.009615	0.006927			90	0.00663281	0.00648967	0.00599219		90	0.00370463	0.00388541	0.00368756
						100	0.008251	0.006253			100	0.00664541	0.00669909	0.00673816		100	0.0029574	0.00368599	0.00434597
	PK_WT-D-EUS					PK_H142N-D-EUS
		data-1	data-2	data-3			data-1	data-2	data-3
	1	5.57889e-05	6.9249e-05	0.00031723		1	0.000172183	0.000123229
	5	0.000145354	0.000121	0.00013671		5	0.000290313	0.000286	0.000215785
	10	0.000129549	0.000148452	0.000137601		10	0.000487512	0.00029	0.000344964
	20	0.00030421	0.000236412	0.000218		20	0.000676891	0.00052	0.000487629
	30	0.000387814	0.00035498	0.00041623		30	0.000697091	0.000817	0.000650779
	40	0.000485831	0.00045189	0.0005132		40	0.000844719	0.000821	0.000693431
	50	0.000580156	0.00048694	0.000679842		50	0.000845081	0.000771042
	60	0.000678952	0.000641017			60	0.00085569	0.000682156
	70	0.00068	0.000690048			70	0.000794893	0.000855	0.00091084
	80	0.00070342	0.000610467			80	0.000849599	0.000697	0.000668454
	90	0.00062987	0.000632336	0.00061		90	0.000862433	0.000846	0.00083412
	100	0.000784962	0.000706979	0.00074685		100	0.000811658	0.000867	0.000926296
Fig S21. Raw data of recycle the formaldehyde generated in the APK pathway
		BbPK with FLS								Only BbPK
		time（h）	0	0.5	1	1.5	2		time（h）	0	0.5	1	1.5	2
	DHA（mM）	Parallel 1	10.2143	2.56534	0.513395	0.096268	0.0249304	DHA（mM）	Parallel 1	9.51878	5.58431	2.69117	1.25947	0.599594
		Parallel 2	9.96365	3.13109	0.731371	0.154725	0.0388016		Parallel 2	9.56832	3.62451	1.01969	0.238943	0.0259212
		Parallel 3	9.71495	4.95317	2.24234	0.938448	0.349913		Parallel 3	9.91014	6.55529	4.68169	3.38771	2.31269
	Ac（mM）	Parallel 1	0	7.72032	11.1646	12.3584	12.1958	Ac（mM）	Parallel 1	0	3.9916	6.19124	7.573	8.87856
		Parallel 2	0	7.43584	10.5042	11.7081	12.7851		Parallel 2	0	5.23112	7.827	8.85316	9.32052
		Parallel 3	0	5.8966	8.24356	10.2806	11.7488		Parallel 3	0	2.62508	4.02208	5.81024	6.36904
	FALD（mM）	Parallel 1	0	2.33226	1.70624	0.972358	0.484667	FALD（mM）	Parallel 1	0	3.62668	5.58447	7.20646	8.62498
		Parallel 2	0	2.2291	1.68045	1.0427	0.547973		Parallel 2	0	5.23277	7.47193	8.50775	9.01185
		Parallel 3	0	1.56556	1.60073	1.39674	1.03097		Parallel 3	0	1.93265	3.53289	4.89696	5.99895
Fig S23. Raw data of APK pathway for growth curve in glycerol minimal medium
		Time(h)	0	1.04	2.11	3.18	4.25	5.32	6.39	7.46	8.53	9.6	10.67	11.74	12.81	13.88	14.94	16.01	17.08	18.15	19.22	20.29	21.36	22.43	23.5	24.57	25.64	26.71	27.78	28.85	29.92	30.99	32.06	33.13	34.2	35.27	36.34	37.41	38.48	39.55	40.62	41.69	42.76	43.83	44.9	45.96	47.03	48.1	49.17
	OD600	without BbPK	0.05	0.05103	0.05223	0.05507	0.0565	0.05467	0.0548	0.05497	0.0562	0.05697	0.05673	0.05767	0.0573	0.05763	0.05703	0.05887	0.05877	0.05997	0.05973	0.05973	0.0594	0.059	0.05927	0.06087	0.06133	0.06237	0.0628	0.06263	0.06177	0.06163	0.06127	0.06093	0.06217	0.06303	0.06217	0.06143	0.06173	0.0603	0.06063	0.06047	0.0625	0.06227	0.06357	0.06397	0.06247	0.06257	0.06103
			0.05	0.05103	0.05223	0.05507	0.0565	0.05467	0.0548	0.05497	0.0562	0.05697	0.05673	0.05767	0.0573	0.05763	0.05703	0.05887	0.05877	0.05997	0.05973	0.05973	0.0594	0.059	0.05927	0.06087	0.06133	0.06237	0.0628	0.06263	0.06177	0.06163	0.06127	0.06093	0.06217	0.06303	0.06217	0.06143	0.06173	0.0603	0.06063	0.06047	0.0625	0.06227	0.06357	0.06397	0.06247	0.06257	0.06103
			0.05	0.05103	0.05223	0.05507	0.0565	0.05467	0.0548	0.05497	0.0562	0.05697	0.05673	0.05767	0.0573	0.05763	0.05703	0.05887	0.05877	0.05997	0.05973	0.05973	0.0594	0.059	0.05927	0.06087	0.06133	0.06237	0.0628	0.06263	0.06177	0.06163	0.06127	0.06093	0.06217	0.06303	0.06217	0.06143	0.06173	0.0603	0.06063	0.06047	0.0625	0.06227	0.06357	0.06397	0.06247	0.06257	0.06103
		with BbPK	0.05	0.05233	0.0554	0.0576	0.05757	0.05687	0.05687	0.05653	0.0561	0.056	0.05693	0.05637	0.05613	0.05677	0.05703	0.05883	0.059	0.0607	0.06163	0.0636	0.06447	0.06663	0.0684	0.07313	0.0802	0.08957	0.10111	0.1161	0.12297	0.12833	0.13047	0.13283	0.13613	0.1394	0.14123	0.1435	0.14427	0.1454	0.14597	0.14627	0.14707	0.14797	0.1488	0.14937	0.1499	0.153	0.15477
			0.05	0.05233	0.0554	0.0576	0.05757	0.05687	0.05687	0.05653	0.0561	0.056	0.05693	0.05637	0.05613	0.05677	0.05703	0.05883	0.059	0.0607	0.06163	0.0636	0.06447	0.06663	0.0684	0.07313	0.0802	0.08957	0.10111	0.1161	0.12297	0.12833	0.13047	0.13283	0.13613	0.1394	0.14123	0.1435	0.14427	0.1454	0.14597	0.14627	0.14707	0.14797	0.1488	0.14937	0.1499	0.153	0.15477
			0.05	0.05233	0.0554	0.0576	0.05757	0.05687	0.05687	0.05653	0.0561	0.056	0.05693	0.05637	0.05613	0.05677	0.05703	0.05883	0.059	0.0607	0.06163	0.0636	0.06447	0.06663	0.0684	0.07313	0.0802	0.08957	0.10111	0.1161	0.12297	0.12833	0.13047	0.13283	0.13613	0.1394	0.14123	0.1435	0.14427	0.1454	0.14597	0.14627	0.14707	0.14797	0.1488	0.14937	0.1499	0.153	0.15477
[truncated: 10 more columns]
